# Supplementary material
Source: PubMed Central journal article supplement (PMC2923885)
Supplement: pp.110.157057_1.pdf [file pp.110.157057_1.pdf]

## SUPPLEMENTAL DATA

The following materials are available in the online version of this article.

**Supplemental Figure S1.** RPL10 sequences are highly conserved between different organisms at nucleotide and amino acid levels. Alignment of the nucleotide (A), coding (B) and amino acid (C) sequences of *Zea mays* and *A. thaliana* RPL10s. Start and stop codons are bold letters. D, Multiple sequence alignment of RPL10 proteins from different species. For protein accession numbers, see Methods. At, *A. thaliana*; Zm, *Zea mays*. The sequences were aligned using the Clustal W2 program. Dashes (-) indicate spaces introduced to promote optimal alignment, perfect matches are represented by an asterisk (\*), high amino-acid similarities by double dots (:), and weak similarities by a single dot (.). Symbols are indicated below the sequences. Signature sequences (motifs) specific to Amidation are shaded grey, specific to Glycosylation pink, specific to Myristoylation yellow, specific to protein kinase C light blue and specific to casein kinase II green. Putative zif domain is bold-underlined.

**Supplemental Figure S2.** Coimmunoprecipitation of RPL10 proteins in *A. thaliana*. A, Immunoblot analysis of *A. thaliana* recombinant RPL10 proteins. Partially purified recombinant RPL10 proteins were run on 12% SDS-PAGE and subjected to immunoblot analysis for RPL10. Ten micrograms of total proteins were loaded in all lanes. B, SDS-PAGE (10%) of RPL10-associated proteins. C, Classification of RPL10-associated proteins based on their cell functions. Proteins with percentage of coverage higher than 10% or at least two tryptic peptides were included in the diagram. Clustering was performed according to Usadel et al. (2006). D, Immunoblot analysis of RPL10-associated proteins. RPL10 proteins were immunoprecipitated from *A. thaliana* crude extracts with antibodies against *H. sapiens* QM protein. The immunocomplexes were solubilized, run on 12% SDS-PAGE and subjected to immunoblot analysis for RPL10, eukaryotic translation initiation factor 2 alpha (eIF2 alpha) and eukaryotic translation initiation factor 2 beta (eIF2 beta). The numbers indicate the molecular mass in kDa. CE: crude extract, IP: immunoprecipitate.

**Supplemental Figure S3.** Complementation of *A. thaliana* homozygous *rpl10B* mutants with WT At *RPL10B*. A, Presence of WT *RPL10B* transcript in transformed *A. thaliana rpl10B* mutant plants analyzed by PCR on genomic DNA. Lanes 1: negative control (without DNA); lane 2-4: genomic DNA from leaves of transformed plants; lanes 5: positive control (pCHF3-

*RPL10B*). B, At *RPL10B* expression level in Arabidopsis WT, *rpl10B* homozygous and complemented plants analyzed by RT-qPCR. Each reaction was normalized using the  $C_t$  values corresponding to the *POLYUBIQUITIN10* mRNA. The means of the results obtained using three independent biological experiments are shown, the error bars indicate the S.D. of the samples. WT levels were set at 1. C, 15-day-old WT (left), *rpl10B* mutant (middle) and complemented plants. Scale bar: 1 cm.

**Supplemental Figure S4.** Inhibition of protein synthesis by UV-B in *A. thaliana* WT and *rpl10* mutant plants. Forty micrograms of total proteins were resolved by 12% SDS-PAGE after *in vivo* [ $^{35}$ S]Met labeling, visualized by autoradiography (A) and staining with Coomassie Blue (B) following the UV-B treatment and recovery period indicated.

**Supplemental Figure S5.** UV-B treatment is not lethal to *A. thaliana* plants. Chlorophyll a (A), Chlorophyll b (B), Flavonoids (C), Maximum Efficiency of PSII (D) and Total proteins (E) were measured after 4 h UV-B (4 h UV-B), 16 h post-treatment (16 h recovery) and in untreated controls (no UV-B). Measurements are the average of six adult leaves from four different plants. Statistical differences from the control are marked with an asterisk ( $P < 0.05$ ).

**Supplemental Figure S6.** Typical 2D gels of leaves from heterozygous *rpl10A-1* mutant and WT plants after a 4 h UV-B treatment. As examples of proteins with differential expression, the relative abundances of some but not all spots annotated by the number that appears in Supplemental Table S3 are shown. The graphs represent one example from at least three different gels used for the differential analysis. The first dimension was carried out using 17 cm immobilized pH gradient strips (pH 3–10); acidic side to the left; and the second dimension was on 12.5% (w/v) SDS-PAGE. The relative abundance of proteins was determined. The protein spots with changes in intensities (least 1.5-fold,  $P < 0.05$ ) were considered to be different.

**Supplemental Figure S7.** Hierarchical cluster analysis of proteins showing different levels in *rpl10A* mutant plants in comparison to WT plants under control conditions and after a 4 h UV-B treatment identified by MS. A, Proteins included show different levels in *rpl10A* mutants (at least 1.5-fold) in comparison to WT plants under control or UV-B conditions. B,

Proteins included show differential abundance (at least 1.5-fold) after a UV-B treatment; these proteins changed differentially in WT plants than in the *rpl10A* mutant. Red indicates higher protein levels than the reference, green indicates lower protein levels than the reference, and black indicates no significant change.

**Supplemental Figure S8.** Classification of proteins showing different levels in the *rpl10A* mutant in comparison to WT plants based on their cell functions. Proteins were identified by 2D Gel electrophoresis and those showing changes in abundances of at least 1.5-fold were included. A, Proteins changed in the *rpl10A* mutant under control (no UV-B) conditions. B, Proteins changed in the *rpl10A* mutant after 4 h of UV-B.

**Supplemental Figure S9.** *RPL10s* promoter sequences with predicted cis-elements. The transcription initiation site (referred to as +1) is indicated in bold letter and the ATG start codon is shown in bold and underlined letters. Numbers at the left refer to the positions of nucleotides relative to the putative transcription initiation site.

**Supplemental Figure 1.** RPL10 sequences are highly conserved between different organisms at nucleotide and amino acid levels. Alignment of the nucleotide (A), coding (B) and amino acid (C) sequences of *Zea mays* and *A. thaliana* RPL10s. D, Multiple sequence alignment of RPL10 proteins from different species.

**A**

```

AtRPL10B -----
AtRPL10C -----
AtRPL10A -----
ZmRPL10-1 GCGAGTGGCGGGGAGAGGAGGCGGCGGGCAAGGGCGCGACGGGGAGGATGATGTCCG 60
ZmRPL10-2 -----

AtRPL10B -----
AtRPL10C -----
AtRPL10A -----
ZmRPL10-1 TGCAGCCTGCAGGAGTTGTGTTCTCTGGCCTTGAGAGAAAGGAGTCGCCAATTTTAGTGG 120
ZmRPL10-2 -----

AtRPL10B -----
AtRPL10C -----
AtRPL10A -----
ZmRPL10-1 GCTCCTGTGTGTTTTTCGGTCCATTCCCTCCAAGGCCAGCATCTGCCAGTGCATGCC 180
ZmRPL10-2 -----

AtRPL10B -----
AtRPL10C -----
AtRPL10A -----
ZmRPL10-1 GTGACGCACAAAACCCACGGCGGCACGGCTCCATTCCGCGTCCGCACTCTCTATATAAAG 240
ZmRPL10-2 -----GTCCACACTCTCTATATAAAG 21

AtRPL10B -----CTTCTTCTTCTTCTTCTTCTTCTTCTTCA 29
AtRPL10C -----AATTCTAGGGT 12
AtRPL10A -----AGTTTTTCGTCGAGCAGCCGCGCTT 26
ZmRPL10-1 TGT-CCCTCTCTCCCTCCAAGCCCTAGACGCACCCCTTCCTCGTTTCGCCGCTCCGCC 299
ZmRPL10-2 TGTTCCTCACTCCACTCCAAGCCCTAGCCGCATCCCTTCTTCATTGCGCCGCGCGCC 81

AtRPL10B TTTCTAGGATTCGAAACAACAATC--AACGCGATGGGACGAAGACCTGCGAGATGTTACC 87
AtRPL10C TTTGCAAACCAACACCGAAGATCC-AACACGATGGGACGAAGACCTGCGAGATGTTACC 71
AtRPL10A TTTGGCCGAGGAAGGATAAAGAGA--GACGCCATGGGAAGAAGACCTGCGAGGTGTTACC 84
ZmRPL10-1 GACACCGACTGCCTACCTCAGCTGCCGTCGCCATGGGCAGAAAGGCTGCTAGATGCTATC 359
ZmRPL10-2 TGC-----TCTCTGCTGCCGTCGCCATGGGGAGAAGGCTGCGAGATGCTATC 129
                * * * * * * * * * * * * * * * *

AtRPL10B GTCAAATTAAGGAAAGCCATACCCTAAATCAAGATACTGTCGTGGTGTCCCGATCCTA 147
AtRPL10C GTCAGATTAAGGAAAGCCATACCCTAAATCAAGATACTGTCGTGGTGTCCAGATCCCA 131
AtRPL10A GTCAGATCAAGGTAAGCCATACCCTAAAGTCTCGCTACTGTCGTGGTGTCCAGATCCAA 144
ZmRPL10-1 GCCAGATCAAGAACAAGCCGTACCCTAAAGTCCAGGTACTGCCGTTGGTGTCCCTGACCCCA 419
ZmRPL10-2 GCCAGATCAAGAACAAGCCATACCCTAAAGTCCAGGTACTGCCGTTGGTGTCCCTGACCCCA 189
                * * * * * * * * * * * * * * * *

AtRPL10B AGATCAGGATTTACGATGTTGGTATGAAGAGGAAAGGAGTTGATGAGTTCCTTACTGTG 207
AtRPL10C AAATCAGGATCTACGATGTTGGTATGAAGAGGAAAGGAGTTGATGAGTTCCTTACTGTG 191
AtRPL10A AAATCAGGATCTACGATGTTGGTATGAAGAGGAAAGGAGTTGATGAGTTCCTTACTGTG 204
ZmRPL10-1 AGATCAGGATCTACGATGTCGGGATGAAGAGGAAAGGAGTTGATGAGTTCCTTACTGTG 479
ZmRPL10-2 AGATCAGGATCTACGATGTTGGTATGAAGAGGAAAGGAGTTGATGAGTTCCTTACTGTG 249
                * * * * * * * * * * * * * * * *

AtRPL10B TTCATTTGGTTTCATGGGAGAAAGAGAATGTTTCAAGTGAAGCTCTTGAAGCTGCTCGTA 267
AtRPL10C TTCATTTGGTTTCATGGGAGAAAGAGAATGTTTCAAGTGAAGCACTTGAAGCAGCACGTA 251
AtRPL10A TCCATTTGGTGTTCATGGGAGAAAGAGAATGTTTCAAGTGAAGCACTTGAAGCTGCCCCTA 264
ZmRPL10-1 TGCACCTTGTCTCTTGGGAGAAGGAGAATGTTTCCAGTGAAGGCTCGAGGCTGCCCCTG 539
ZmRPL10-2 TGCACCTTGTCTCTTGGGAGAAGGAGAATGTTTCCAGTGAAGGCTCTTGAAGGCTGCCCCTA 309
                * * * * * * * * * * * * * * * *
    
```

```

AtRPL10B       TTGCTTGTAACA----- 279
AtRPL10C       TTGCTTGCAACA----- 263
AtRPL10A       TTGCTTGCAACA----- 276
ZmRPL10-1     TTGCTGCAACAAGTACATGACCAAGTCTGCAGGAAAGGATGCCTTCCACCTTAGGGTCC 599
ZmRPL10-2     TTGCTGCAACA----- 321
                **** * * *
AtRPL10B       -----AGTACATGGTGAAGTCTGCCGGGAAAGATGCCTTTTCATCTCCGTATTA 327
AtRPL10C       -----AGTATATGGTGAATCTGCTGGGAAAGATGCTTTTCATTTGAGGATTA 311
AtRPL10A       -----AGTACATGGTGAAGTCTGCTGGAAAGATGCTTTTCATTTGAGGATTA 324
ZmRPL10-1     GTGCTGCAACAAGTACATGACCAAGTCTGCAGGAAAGGATGCCTTCCACCTTAGGGTCC 659
ZmRPL10-2     -----AGTACATGACCAAGTCTGCAGGAAAGGATGCCTTCCACCTTCGGGTCC 369
                **** * * * * * * * * * * * * * * *
AtRPL10B       GAGTTCATCCTTTCCATGTTCTTAGGATCAATAAGATGCTTCTTGCTGGAGCTGATA 387
AtRPL10C       GGGTTCATCCTTTCCATGTTCTCAGGATTAACAAGATGCTTTCGTGCTGGAGCTGATA 371
AtRPL10A       GGGTTCATCCTTTCCATGTTCTCAGGATTAACAAGATGCTTTCGTGCTGGAGCTGATA 384
ZmRPL10-1     GGGTTCACCCGTTCCATGCTCTCCGTATCAACAAGATGCTTTCGTGCTGGAGCTGATA 719
ZmRPL10-2     GGGTTCACCCCTTCCATGCTCTCCGTATCAACAAGATGCTTTCGTGCTGGAGCTGATA 429
                * * * * * * * * * * * * * * * * * * * * * * * * * * * * * * * *
AtRPL10B       GACTTCAGACTGGTATGAGAGGTGCTTTTGGCAAAGCTCTTGGTACTTGTGCTAGAGTTG 447
AtRPL10C       GGCTTCAGACTGGAATGAGAGGTGCTTTTGGTAAAGCTCTTGGTACTTGTGCTAGAGTTG 431
AtRPL10A       GGCTTCAGACTGGTATGAGAGGTGCTTTTGGTAAAGCTTTGGTACTTGTGCTCGTGTGG 444
ZmRPL10-1     GGCTTCAGACTGGAATGAGGGGTGCTTTTGGCAAGCCTCAGGGCACCTGTGCTAGGGTGG 779
ZmRPL10-2     GGCTCCAGACTGGAATGAGGGGTGCTTTTGGCAAGCCTCAGGGCACCTGTGCTAGGGTGG 489
                * * * * * * * * * * * * * * * * * * * * * * * * *
AtRPL10B       CTATTGGACAGGTCTTTTGTCTGTGAGGTGCAAAGATGCTCATGGTTCATGCTCAGG 507
AtRPL10C       CGATTGGACAGGTCTTTTGTCTGTAGGTGTAAGGATAATCATGGAGTTTCATGCTCAGG 491
AtRPL10A       CTATTGGACAGGTCTTTTGTCTGTTCGTTGCAAGGATGCCCATGGTCCATGCTCAAG 504
ZmRPL10-1     ACATTGGTCAGGTCTCTCTTCCGTGCGATGCAAGGACAAACAATGCTGCCATGCCAGCG 839
ZmRPL10-2     ACATTGGTCAGGTCTCTCTTCTGTTCGATGCAAGGACAAACAATGCTGCACATGCCAGTG 549
                ***** * * * * * * * * * * * * * * * * * * * * * *
AtRPL10B       AGGCTCTTCGTGCTGTAAGTTTAAAGTCCCTGGTTCGTCAAAAGATCATTTAGCAGGA 567
AtRPL10C       AAGCTCTTCGTGAGAGCTAAAGTTTAAAGTCCCTGGTTCGTCAAAAGATCATTTAGCAGGA 551
AtRPL10A       AAGCTCTTCGTGCTGTAAGTTTAAAGTCCCTGGTTCGTCAAAAGATTATTGTCAGCAGGA 564
ZmRPL10-1     AAGCTCTGCGTTCGCGCTAAAGTTTAAAGTCCCTGGTTCGTCAAAAGATTATTGAGAGCAGAA 899
ZmRPL10-2     AAGCTCTGCGTTCGCGCAAGTTTAAAGTCCCTGGTTCGTCAAAAGATTATTGAGAGCAGAA 609
                * * * * * * * * * * * * * * * * * * * * * * * * *
AtRPL10B       AATGGGGGTTACCAAGTTTAAACCGTGTGATTACACAAAGCTAAGGCAAGAGAAGAGGA 627
AtRPL10C       AATGGGGATTACTAAATCAACCGTGTGAGTACACGAAGCTGAGAGCGATGAAGAGGA 611
AtRPL10A       AATGGGGCTTACCAAGTTTAAACAGAGTGTACTTACCAAGTTGAGGCAAGAGAAGCGTG 624
ZmRPL10-1     AGTGGGGCTTACCAAGTTTACCGCGCTGACTACCTGAAAGTACAAGAGCGAGGGCAGAA 959
ZmRPL10-2     AGTGGGGCTTACCAAGTTTACCGTGCCTGACTACCTGAAAGTACAAGAGTGAGGGTAGAA 669
                * * * * * * * * * * * * * * * * * * * * * * * * *
AtRPL10B       TTGTCCCTGATGGTGTAATGCCAAGTTCCTATCTTGCCATGGTCCGTTGGCTAACCGTC 687
AtRPL10C       TTGTCCCTGATGGTGCAATGCTAAGTTTCTATCAAAACCATGGTCCATGGCTAACCGTC 671
AtRPL10A       TTGTCCCTGATGGTGCAACGCTAAGTTCCTCTCATGCCATGGACCTTTGGCTAACCGTC 684
ZmRPL10-1     TTGTCCCTGATGGTGCAACGCAAGTGTGCTCGGCAACCCAGGAGACTTGAGAAGCGTG 1019
ZmRPL10-2     TTGTCCCTGATGGTGCAACGCAAGTGTGCTCGGTAACCATGGAAGACTTGAGAAGCGTG 729
                **** * * * * * * * * * * * * * * * * * * * * * *
AtRPL10B       AGCCCGGAAGTGCCTTCTTGTCAG---CTGGTGCA-----CAGTGATGCAG 730
AtRPL10C       AACCTGGAAGTGCCTTCATATCAGCC-ACTAGCGAA-----TAAGAATGAAG 717
AtRPL10A       AGCCGGGAAGTGCCTTTTGGCAGCCACTACTGAAGAGTAT-----CAGAACTGAAG 737
ZmRPL10-1     CTCCTGGGAAGGCTTTCCTCGATGCC-GTTGCTTAAGTGC-----GGATGCGA 1066
ZmRPL10-2     CTCCTGGGAAGGCTTTCCTCGAGGCC-GTTGCTTAAGTCCAATCTACAGTTGGAATGCGA 788
                * * * * * * * * * * * * * * * * * * * * * *
AtRPL10B       A-----TGACTTGTCGATG--TGGAGTTGATATCTAGTTTT 765
AtRPL10C       AA-----GATGATGATGATTGTGGTTG--TAGAACCATAATGATGTTTT 761
AtRPL10A       TATCTTCTCATTCGCGTGAAGAAGTATAAATCAGCCTGAATCTTTTACTTATCGTT 797
ZmRPL10-1     ATCTTGACGTTTTTGTCTTAGCGTATCTTACTTTGCTTCGTTGGAACATGAATTTCAAGTGT 1126
ZmRPL10-2     ATCCAGACGTTTTTGGTTTAGCCTATCTTATTTTGTCTTGTGCAACATGAATTTTAAAGTGT 848
                * * * * * * * *
AtRPL10B       GGCAGATACTCAGTTTTTATTTTTTTTGGTTAGTGTACAGTTACAACAATCTCTTGCG 825
AtRPL10C       TGCTCTT-TTCTGTTTCAATTTTATTTGT-AACAGTTGTAG--ACAAG-GATCCTCGTATG 816
AtRPL10A       ATCTCTGGTGTGTTTTAAGTTTTTGTAGTTGGACACAATCAGTATCTGAAATCTTTTGTG 857

```

ZmRPL10-1 TTTGAGGGTATTACAGTGCCTTATGTGAACTGCCTATCT-TGTGCTGAACATCGGAATG 1185  
ZmRPL10-2 AT--GGGGTATTACAGTGCCTTGTGTGAACCTGCCTATCT-CGTGCTGAACATCGTTATG 905  
\* \* \* \*

AtRPL10B GTTCTG-----TTGTTTCATGGATAAGTTTTATGAAAGACTTGTTT---TGTATC---- 872  
AtRPL10C ATTCCAAGACAATTGTTTCAACATGTGTTTCTTACTTTTATAATTC---CATCATCCAGT 873  
AtRPL10A ACTCTTTTGTTTAAGCTCTGAAATGATTTGTTCCTTCGTT--CTT---GGCCATATATC 912  
ZmRPL10-1 TATCCTC--CGAGTATGTTTAATCGCATTAAATTTTATTGGAAATG---GTTGCGGAAC 1239  
ZmRPL10-2 CAT-----GGAAGTACTTATCT---TTGTCTGCTAAAAATAAAGTGTCTGCGAC 955  
\* \* \* \*

AtRPL10B -----  
AtRPL10C TTCTCCTTT----- 882  
AtRPL10A TTTCATTTGCAAGTTTATCATGGCTTTAGCTTAAATATTTAATGAAGATTTGCTTG 972  
ZmRPL10-1 AATGTCCAATTTACTCGAATTTGATTTCCACCACGATCTTTTCTTATCCTTAAATTTGTA 1299  
ZmRPL10-2 TAAATATA-TCTTCTCAATCTGGATTGTCTC----TTTAATTTTATTGGAGATGGTTACA 1010

AtRPL10B -----  
AtRPL10C -----  
AtRPL10A -----  
ZmRPL10-1 TAGAATACGTATTTGTGTGCCATCGCCTTTCCGGAGCTCACCAAACAGTCGTTCTGCAG 1359  
ZmRPL10-2 CAAA----- 1014

AtRPL10B -----  
AtRPL10C -----  
AtRPL10A -----  
ZmRPL10-1 CAGCGTGAAACTGGACTTCAGAGAGAATATTGGGACGAGA 1399  
ZmRPL10-2 -----

**B**

AtRPL10A **ATGGGAAGAAGACCTGCGAGGTGTTACCGTCAGATCAAGGGTAAGCCATACCCAAAGTCT** 60  
AtRPL10C **ATGGGACGAAGACCTGCGAGATGTTACCGTCAGATTAAGGGAAAGCCATACCCGAAATCA** 60  
AtRPL10B **ATGGGACGAAGACCTGCGAGATGTTACCGTCAAATTAAGGGAAAGCCATACCCATAATCA** 60  
ZmRPL10-1 **ATGGGCAGAAGGCCTGCTAGATGCTATCGCCAGATCAAGAACAAGCCGTACCCCTAAGTCC** 60  
ZmRPL10-2 **ATGGGGAGAAGGCCTGCGAGATGCTATCGCCAGATCAAGAACAAGCCATACCCCAAGTCC** 60  
\*\*\*\*\* \*\* \*\* \*\* \*\*

AtRPL10A CGCTACTGTCGTGGTGTGCCAGATCCAAAAATCAGGATCTACGATGTTGGTATGAAGAGG 120  
AtRPL10C CGATACTGTCGTGGTGTGCCAGATCCAAAAATCAGGATCTACGATGTTGGTATGAAGAGG 120  
AtRPL10B AGATACTGTCGTGGTGTGCCAGATCCAAAGATCAGGATTTACGATGTTGGTATGAAGAGG 120  
ZmRPL10-1 AGGTAAGTCCGTGGTGTCCCTGACCCCAAGATCAGGATCTACGATGTCGGGATGAAGAGG 120  
ZmRPL10-2 AGGTAAGTCCGTGGTGTCCCTGACCCCAAGATCAGGATCTACGATGTTGGCATGAAGAGA 120  
\* \*\*\*\*\* \*\* \*\* \*\*

AtRPL10A AAGGGTGTGATGAGTTTCCATTCTGTGCCATTTGGTGTGATGGGAGAAGGAGAATGTG 180  
AtRPL10C AAAGGTGTGATGAGTTTCCATTCTGTGTTTCATTTGGTTTTCATGGGAGAAGGAGAATGTG 180  
AtRPL10B AAAGGAGTTGATGAGTTCCCTTACTGTGTTTCATTTGGTTTTCATGGGAGAAGGAGAATGTG 180  
ZmRPL10-1 AAGGGTGTGATGAGTTCCCTTACTGTGTGCACCTTGTCTCTTGGGAGAAGGAGAATGTG 180  
ZmRPL10-2 AAGGGTGTGATGAGTTCCCTTACTGTGTGCACCTTGTCTCTTGGGAGAAGGAGAATGTG 180  
\*\* \*\* \*\*\*\*\* \*\* \*\* \*\*

AtRPL10A TCAAGTGAAGCACTTGAAGCTGCCCGTATT----- 210  
AtRPL10C TCAAGTGAAGCACTTGAAGCAGCAGTATT----- 210  
AtRPL10B TCAAGTGAAGCTCTTGAAGCTGCTCGTATT----- 210  
ZmRPL10-1 TCCAGTGAAGCGCTCGAGGCTGCCCGCATTGCCTGCAACAAGTACATGACCAAGTCTGCA 240  
ZmRPL10-2 TCCAGTGAAGCTCTTGAAGCTGCCCGTATT----- 210  
\*\* \*\*\*\*\* \*\* \*\* \*\*

AtRPL10A -----GCTTGCAACAAGTACATGGTGAAGTCTGCT 240  
AtRPL10C -----GCTTGCAACAAGTATATGGTGAATCTGCT 240  
AtRPL10B -----GCTTGTAACAAGTACATGGTGAAGTCTGCC 240  
ZmRPL10-1 GGAAAGGATGCCTTCCACCTTAGGGTCCGTGCCGCAACAAGTACATGACCAAGTCTGCA 300  
ZmRPL10-2 -----GCTTGCAACAAGTACATGACCAAGTCTGCA 240  
\*\* \*\* \*\*\*\*\* \*\* \*\* \*\*

AtRPL10A GGAAAAGATGCTTTTTCATTTGAGGATTAGGGTTCATCCTTTCCATGTTCTCAGGATTAAC 300  
AtRPL10C GGGAAAGATGCTTTTTCATTTGAGGATTAGGGTTCATCCTTTCCATGTTCTCAGGATTAAC 300  
AtRPL10B GGGAAAGATGCTTTTTCATCTCCGTATTAGAGTTCATCCTTTCCATGTTCTTAGGATCAAT 300  
ZmRPL10-1 GGAAAGGATGCCTTCCACCTTAGGGTCCGGGTTACCCGTTCCATGTCCTCCGTATCAAC 300  
ZmRPL10-2 GGAAAGGATGCCTTCCACCTTAGGGTCCGGGTTACCCCTTCCATGTCCTTCCGTATCAAC 300  
\*\* \*\* \*\*\*\*\* \*\* \*\* \*\*

AtRPL10A AAGATGCTTTCGTGTGCTGGAGCTGATAGGCTTCAGACTGGTATGAGAGGTGCTTTTGGT 360  
AtRPL10C AAGATGCTTTCGTGTGCTGGAGCTGATAGGCTTCAGACTGGAATGAGAGGTGCTTTTGGT 360  
AtRPL10B AAGATGCTTTCGTGTGCTGGAGCTGATAGACTTCAGACTGGTATGAGAGGTGCTTTTGGC 360  
ZmRPL10-1 AAGATGCTTTCGTGTGCTGGGGCTGATAGGCTCCAGACTGGAATGAGGGGTGCTTTTGGC 420  
ZmRPL10-2 AAGATGCTTTCGTGTGCTGGGGCTGATAGGCTCCAGACTGGAATGAGGGGTGCTTTTGGC 360  
\*\*\*\*\* \*\* \*\* \*\*

AtRPL10A AAAGCTTTGGGTAAGTGTGCTCGTGTGCTATTGGACAGGTTCTTTTGTCTGTTGCTGTC 420  
AtRPL10C AAAGCTTTCGTGTAAGTGTGCTTAGAGTTGCGATTGGACAGGTTCTTTTGTCTGTTAGGTG 420  
AtRPL10B AAAGCTTTCGTGTAAGTGTGCTTAGAGTTGCTATTGGACAGGTTCTTTTGTCTGTTAGGTG 420  
ZmRPL10-1 AAGCCTCAGGGCACCTGTGCTAGGGTGGACATTGGTTCAGGTCCTCTTTCCGTGCGATGC 480  
ZmRPL10-2 AAGCCTCAGGGCACCTGTGCTAGGGTGGACATTGGTTCAGGTCCTCTTTCCGTGCGATGC 420  
\*\* \*\* \*\* \*\*

AtRPL10A AAGGATGCCCATGGTACCATGCTCAAGAGGCTCTTCGTGCTGCTAAGTTCAAGTTCCTT 480  
AtRPL10C AAGGATAATCATGGAGTTCATGCTCAGGAAGCTCTTCGTAGAGCTAAGTTTAAAGTTCCTT 480  
AtRPL10B AAAGATGCTCATGGTTCATGCTCAGGAGGCTCTTCGTGCTGCTAAGTTTAAAGTTCCTT 480  
ZmRPL10-1 AAGGACAACAATGCTGCCATGCCAGCGAAGCTCTGCGTCCGCTAAGTTCAAGTTCCTT 540  
ZmRPL10-2 AAGGACAACAATGCTGCACATGCCAGTGAAGCTCTGCGTCCGCTAAGTTCAAGTTCCTT 480  
\*\* \*\* \*\* \*\*

AtRPL10A GGTCGTCAAAGATTATTGTGAGCAGGAAATGGGGTTCACGAAGTTTAAACAGAGCTGAC 540  
AtRPL10C GGTCGTCAAAGATCATTGTTAGCAGGAAATGGGGTTCACAAAGTTTAAACCGTGCATGAC 540  
AtRPL10B GGTCGTCAAAGATCATTGTTAGCAGGAAATGGGGTTCACCAAGTTTAAACCGTGCATGAC 540  
ZmRPL10-1 GGCCGCCAAAAGATCATTGAGAGCAGAAAGTGGGGTTCACCAAGTTTAAACCGTGCATGAC 600  
ZmRPL10-2 GGCCGCCAAAAGATTATTGAGAGCAGAAAGTGGGGTTCACCAAGTTTAAACCGTGCATGAC 540  
\*\* \*\* \*\*\*\*\* \*\* \*\* \*\*

AtRPL10A TTCACCAAGTTGAGGCAAGAGAAGCGTGTGTCCTGATGGTGTCAACGCTAAGTTCCTC 600  
AtRPL10C TACACCAAGCTGAGAGCGATGAAGAGGATTGTGCTGATGGTGTCAATGCTAAGTTTCTA 600

AtrPL10B TACACAAAGCTAAGGCAAGAGAAGAGGATTGTCCCTGATGGTGTAATGCCAAGTTCCTA 600  
 ZmRPL10-1 TACCTGAAGTACAAGAGCGAGGGCAGAATTGTTCCCTGATGGTGCAACGCAAAGCTGCTC 660  
 ZmRPL10-2 TACCTGAAGTACAAGAGTGAGGGTAGAATTGTTCCCTGATGGTGCAACGCAAAGCTGCTC 600  
 \* \* \*\* \* \* \* \* \* \* \* \* \* \* \* \* \* \* \* \* \*

AtrPL10A TCATGCCATGGACCTTTGGCTAACCCTCAGCCGGGAAGTGCCTTTTGGCAGCCACTAC 660  
 AtrPL10C TCAAACCATGGTCCATGGCTAACCCTCAACCTGGAAGTGCCTTCATATCAGCC-ACTAG 659  
 AtrPL10B TCTTGCCATGGTCCGTTGGCTAACCCTCAGCCGGGAAGTGCCTTCTTGCAGCT-GGTGC 659  
 ZmRPL10-1 GGCAACCACGGCAGACTTGAGAAGCGTGCTCCTGGGAAGGCTTTCCTCGATGCC-GTGC 719  
 ZmRPL10-2 GGTAACCATGGAAGACTTGAGAAGCGTGCTCCTGGGAAGGCTTTCCTCGAGGCC-GTGC 659  
 \* \* \* \* \* \* \* \* \* \* \* \* \* \* \* \* \*

AtrPL10A TGA--- 663  
 AtrPL10C CGAATAA 666  
 AtrPL10B ACAGTGA 666  
 ZmRPL10-1 TTAA--- 723  
 ZmRPL10-2 TTAA--- 663  
 \*



C

AtrRPL10A MGRRPARCYRQIKGKPYPKSRYCRGVPDPKIRIYDVGMRKRGVDEFPPFCVHLVSWEKENV 60  
AtrRPL10B MGRRPARCYRQIKGKPYPKSRYCRGVPDPKIRIYDVGMRKRGVDEFPPYCVHLVSWEKENV 60  
AtrRPL10C MGRRPARCYRQIKGKPYPKSRYCRGVPDPKIRIYDVGMRKRGVDEFPPFCVHLVSWEKENV 60  
ZmRPL10-1 MGRRPARCYRQIKNKPYPKSRYCRGVPDPKIRIYDVGMRKRGVDEFPPYCVHLVSWEKENV 60  
ZmRPL10-2 MGRRPARCYRQIKNKPYPKSRYCRGVPDPKIRIYDVGMRKRGVDEFPPYCVHLVSWEKENV 60  
\*\*\*\*\*.\*\*\*\*\*:\*\*\*\*\*

AtrRPL10A SSEALEAARIACNKYMKVKSAGKDAFHLLRIRVHPFHVLRINKMLSCAGADRLQTGMRGAFG 120  
AtrRPL10B SSEALEAARIACNKYMKVKSAGKDAFHLLRIRVHPFHVLRINKMLSCAGADRLQTGMRGAFG 120  
AtrRPL10C SSEALEAARIACNKYMKVKSAGKDAFHLLRIRVHPFHVLRINKMLSCAGADRLQTGMRGAFG 120  
ZmRPL10-1 SSEALEAARIACNKYMTKSAGKDAFHLLRVRVHPFHVLRINKMLSCAGADRLQTGMRGAFG 120  
ZmRPL10-2 SSEALEAARIACNKYMTKSAGKDAFHLLRVRVHPFHVLRINKMLSCAGADRLQTGMRGAFG 120  
\*\*\*\*\*.\*\*\*\*\*:\*\*\*\*\*

AtrRPL10A KALGTCARVAIGQVLLSVRCKDAHGHHAQEALRRAKFKFPGRQKIIIVSRKWGF TKFNRA D 180  
AtrRPL10B KALGTCARVAIGQVLLSVRCKDAHGHHAQEALRRAKFKFPGRQKIIIVSRKWGF TKFNRA D 180  
AtrRPL10C KALGTCARVAIGQVLLSVRCKDNHGVHAQEALRRAKFKFPGRQKIIIVSRKWGF TKFNRA E 180  
ZmRPL10-1 KPQGT CARVDIGQVLLSVRCKDNNAHASEALRRAKFKFPGRQKIIIVSRKWGF TKFSRA D 180  
ZmRPL10-2 KPQGT CARVDIGQVLLSVRCKDNNAHASEALRRAKFKFPGRQKIIIVSRKWGF TKFSRA D 180  
\* . \*\*\*\*\* \*\*\*\*\* : . \*\* . \*\*\*\*\* \*\*\*\*\* \*\*\*\*\* . \*\* :

AtrRPL10A FTKLRQEKRVVPDGVNAKFLSCHGPLANRQPGSAFLPAHY- 220  
AtrRPL10B YTKLRQEKRIVPDGVNAKFLSCHGPLANRQPGSAFLSAGA Q 221  
AtrRPL10C YTKLRAMKRIVPDGVNAKFLSNHGPLANRQPGSAFISATSE 221  
ZmRPL10-1 YLKYSSEGRIVPDGVNAKLLGNHGRLEKRAPGKAFLEAVA- 220  
ZmRPL10-2 YLKYSSEGRIVPDGVNAKLLGNHGRLEKRAPGKAFLEAVA- 220  
: \* : \* : \*\*\*\*\* : \* . \*\* \* : \* \*\* . \*\* : \*

D

*H. sapiens* MGRRPARCYRYCKNKPYPKSRFCRGVPDAKIRIFDLGRKKAKVDEFPPLCGHMVSDEYEQL 60  
*M. musculus* MGRRPARCYRYCKNKPYPKSRFCRGVPDAKIRIFDLGRKKAKVDEFPPLCGHMVSDEYEQL 60  
*G. gallus* -----PRCYRYCKNKPYPKSRFCRGVPDPKIRIFDLGRKKAKVDEFPPLCGHMVSDEYEQL 55  
*C. elegans* MGRRPARCYRYIKNKPYPKSRFCRGVPDAKIRIFDLGNKRANVDTFPACVHMSNEREHL 60  
*S. cerevisiae* MARRPARCYRYQKNKPYPKSRYNRAVPDSKIRIYDLGKKKATVDEFPPLCVHLSVNELEQL 60  
*Z. mays-1* MGRRPARCYRQIKNKPYPKSRYCRGVDPDKIRIYDVGMRKKGVDFFPYCVHLSWEKENV 60  
*Z. mays-2* MGRRPARCYRQIKNKPYPKSRYCRGVDPDKIRIYDVGMRKKGVDFFPYCVHLSWEKENV 60  
*S. melongena* MGRRPARCYRQIKNKPYPKSRFCRGVPDPKIRIYDVGMRKKGVDFFPYCVHLSWEKENV 60  
*L. esculatum* MGRRPARCYRQIKNKPYPKSRFCRGVPDPKIRIYDVGMRKKGVDFFPYCVHLSWEKENV 60  
*A. thaliana-A* MGRRPARCYRQIKGKPYPKSRYCRGVDPDKIRIYDVGMRKKGVDFFPYCVHLSWEKENV 60  
*A. thaliana-B* MGRRPARCYRQIKGKPYPKSRYCRGVDPDKIRIYDVGMRKKGVDFFPYCVHLSWEKENV 60  
*A. thaliana-C* MGRRPARCYRQIKGKPYPKSRYCRGVDPDKIRIYDVGMRKKGVDFFPYCVHLSWEKENV 60  
*P. taeda* MGRRPARCYRQIKNKPYPKSRYCRGVDPDKIRIFDVGAKKRLVDEFFPYCVHLSWEKENV 60  
*T. brucei* MARRPARCYRFCCKNKPYPKSRFCRGVPDPRIRTFDIGKRRAPVDEFPVCHVVVSRELEQI 60  
*E. histolytica* MGRRPGRCYRLVRGHPYPKSKYCRGVDPDRIKLFDIGNRSAPCDDFPCCVHIVGLERENI 60  
 \*\*\*\*\*:..\*\*\*\*\*:\*.\*\*\*\*.:\*: :\*: \* \* \* \* \* \* . : . : \* \* \*

*H. sapiens* SSEALEAARICANKYMKVSCGKDGFHIRVRLHFFHVIRINKMLSCAGADRLQTMGRGAF 120  
*M. musculus* SSEALEAARICANKYMKVSCGKDGFHIRVRLHFFHVIRINKMLSCAGADRLQTMGRGAF 120  
*G. gallus* SSEALEAARICANKYMKVSCGKDGFHIRVRLHFFHVIRINKMLSCAGADRLQTMGRGAF 115  
*C. elegans* SSEALEAARICANKYMKVNCCKGKDFHLRVRKHPFFHVTRINKMLSCAGADRLQTMGRGAYG 120  
*S. cerevisiae* SSEALEAARICANKYMTTVSGRDAFHLRVRVHPFFHVLRINKMLSCAGADRLQTMGRGAW 120  
*Z. mays-1* SSEALEAARIACNKYMTKSAGKDAFHLLRVRVHPFFHVLRINKMLSCAGADRLQTMGRGAF 120  
*Z. mays-2* SSEALEAARIACNKYMTKSAGKDAFHLLRVRVHPFFHVLRINKMLSCAGADRLQTMGRGAF 120  
*S. melongena* SSEALEAARIACNKYMTKSAGKDAFHLLRVRVHPFFHVLRINKMLSCAGADRLQTMGRGAF 120  
*L. esculatum* SSEALEAARIACNKYMTKSAGKDAFHLLRVRVHPFFHVLRINKMLSCAGADRLQTMGRGAF 120  
*A. thaliana-A* SSEALEAARIACNKYMTKSAGKDAFHLLRVRVHPFFHVLRINKMLSCAGADRLQTMGRGAF 120  
*A. thaliana-B* SSEALEAARIACNKYMTKSAGKDAFHLLRVRVHPFFHVLRINKMLSCAGADRLQTMGRGAF 120  
*A. thaliana-C* SSEALEAARIACNKYMTKSAGKDAFHLLRVRVHPFFHVLRINKMLSCAGADRLQTMGRGAF 120  
*P. taeda* SSEALEAGRIACNKYMKVFKAGKDFHLLRVRVHPFFHVLRINKMLSCAGADRLQTMGRGAF 120  
*T. brucei* SSEALEAARIQANKYMKRANKECFHMRIRAHPFFHVLRINKMLSCAGADRLQTMGRQSYG 120  
*E. histolytica* SSEAMEAARIQANKYMKVFKAGKDFHLLRVRVHPFFHVLRINKMLSCAGADRLQTMGRGAW 120  
 \*\*\*\*\*:..\*\*\*\*\*:\*.\*\*\*\*.:\*: :\*: \* \* \* \* \* \* . : . : \* \* \*

*H. sapiens* KPQGTVARVHIGQVIMSIRTKLQNKHEVIEALRRAKFKFPGRQKIHSKKGWFTKFNAD 180  
*M. musculus* KPQGTVARVHIGQVIMSIRTKLQNKHEVIEALRRAKFKFPGRQKIHSKKGWFTKFNAD 180  
*G. gallus* KPQGTVARVHMGQVIMSIRTKAQNKHEVIEALRRAKFKFPGRQKIHSKKGWFTKFNADA 175  
*C. elegans* KPQGLVARVDIGDILFSMRIRKEGNVKHAI EAFRRAKFKFPGRQII VSRKKGWFTKWDRED 180  
*S. cerevisiae* KPHGLAARVDIGQIIFSVRTRKDNKDVVEGLRRLARYKFPQGQKIILSKKKGWFTKFNAD 180  
*Z. mays-1* KPQGTVARVDIGQVLLSVCCKDNNAAHASEALRRAKFKFPGRQKIIIE SRKKGWFTKFSRAD 180  
*Z. mays-2* KPQGTVARVDIGQVLLSVCCKDNNAAHASEALRRAKFKFPGRQKIIIE SRKKGWFTKFSRAD 180  
*S. melongena* KPQGVARVAIGQVLLSVCCKDGNANHAQEALRRAKFKFPGRQKIIIE SRKKGWFTKFSRDT 180  
*L. esculatum* KPQGVARVAIGQVLLSVCCKDGNANHAQEALRRAKFKFPGRQKIIIE SRKKGWFTKFSRDT 180  
*A. thaliana-A* KALGTCARVAIGQVLLSVCCKDAGHHAQEALRRAKFKFPGRQKIIIE SRKKGWFTKFNAD 180  
*A. thaliana-B* KALGTCARVAIGQVLLSVCCKDAGHHAQEALRRAKFKFPGRQKIIIE SRKKGWFTKFNAD 180  
*A. thaliana-C* KALGTCARVAIGQVLLSVCCKDNHGVHAQEALRRAKFKFPGRQKIIIE SRKKGWFTKFNAD 180  
*P. taeda* KPQGTVARVAIGQVLLSVCCKDGNANHAQEALRRAKFKFPGRQKIIIE SRKKGWFTKFNAD 180  
*T. brucei* KPNGTCARVRIQILLSMRTKDYVVPQALESLRRAKMKFPGRQIIVISKYWGFTKFNAD 180  
*E. histolytica* KSYGSCARVKGQVLI SGRCKEQHLPAKIM SFLACYKFAGRQKLVISKKGWFTKYTKEE 180  
 \* . \* \* \* \* :\*::: \* \* \* : : \* \* \* \* \* \* : \* \* \* \* \* \* : : . \* \* \* \* \* \*

*H. sapiens* FEDMVAEKRLIPDCCGVKVIIPNRGPLDK-WRALHS----- 214  
*M. musculus* FEDMVAEKRLIPDCCGVKVIIPNRGPLDK-WRALHS----- 214  
*G. gallus* FEEMVAQKRLIPDCCGVKVIIPNRGPLDR-WRALHAA----- 210  
*C. elegans* YERMRAEGRRLSDGQVQVLRQEHGPLETK-WIENPI----- 214  
*S. cerevisiae* YLKKREAGEVVKDDGAFVFKLSKKGSLENNIREFPEYFAAQA----- 221  
*Z. mays-1* YLKYKSEGRIVDPDGVNAKLLGNHGRLERAPGKAFLEAVA----- 220  
*Z. mays-2* YLKYKSEGRIVDPDGVNAKLLGNHGRLERAPGKAFLEAVA----- 220  
*S. melongena* YLKYKSENRIVDPDGVNAKLLGNHGRLAA-RQPGRAFLEASS----- 219  
*L. esculatum* YLKYKSENRIVDPDGVNAKLLGNHGRLAA-RQPGRAFLEAAN----- 220  
*A. thaliana-A* FTKLROEKRVVDPDGVNAKFLSCHGPLAN-RQPGSAFLPAHY----- 220  
*A. thaliana-B* YTKLROEKRVVDPDGVNAKFLSCHGPLAN-RQPGSAFLSAGA----- 221  
*A. thaliana-C* YTKLRAMKRIVDPDGVNAKFLSCHGPLAN-RQPGSAFISATSE----- 221  
*P. taeda* YLKWKTENRIVDPDGVNPKLLGCRGPLSN-RKPGQAFLPKPAVLLSSDLVA 228  
*T. brucei* YEELRDAGKLRQGLHVKLITPKGKITP--YNIMA----- 213  
*E. histolytica* YQQLNKDGKIIADGCYFKLATTKGPLK--VN----- 210  
 : . : \* : : \* :

## Supplemental Figure 2

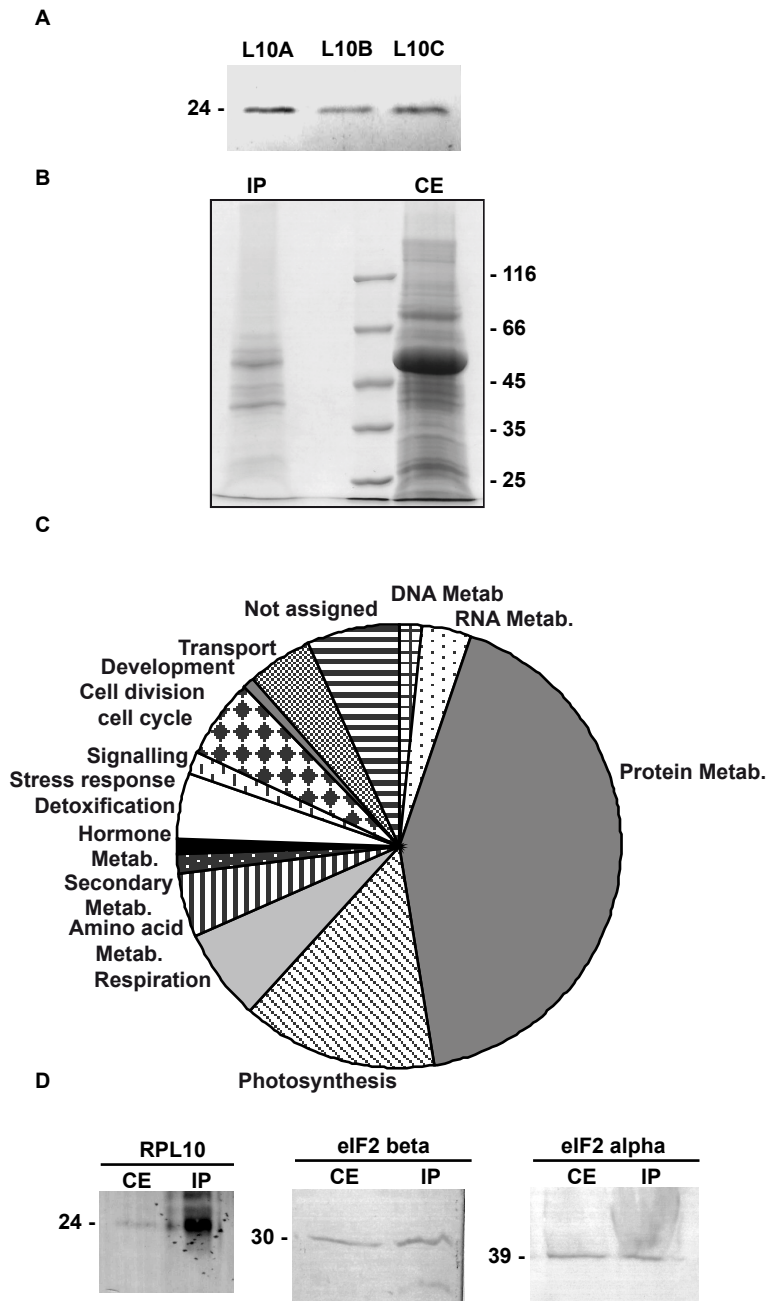

**Coimmunoprecipitation of RPL10 proteins in *A. thaliana*.** **A, Immunoblot analysis of *A. thaliana* recombinant RPL10 proteins.** Partially purified recombinant RPL10 proteins were run on 12% SDS-PAGE and subjected to immunoblot analysis for RPL10. Ten micrograms of total proteins were loaded in all lanes. **B, SDS-PAGE (10%) of RPL10-associated proteins.** **C, Classification of RPL10-associated proteins based on their cell functions.** Proteins with percentage of coverage higher than 10% or at least two tryptic peptides were included in the diagram. Clustering was performed according to Usadel et al. (2006). **D, Immunoblot analysis of RPL10-associated proteins.** RPL10 proteins were immunoprecipitated from *A. thaliana* crude extracts with antibodies against *H. sapiens* QM protein. The immunocomplexes were solubilized, run on 12% SDS-PAGE and subjected to immunoblot analysis for RPL10, eukaryotic translation initiation factor 2 alpha (eIF2 alpha) and eukaryotic translation initiation factor 2 beta (eIF2 beta). The numbers indicate the molecular mass in kDa. CE: crude extract, IP: immunoprecipitate.

### Supplemental Figure 3

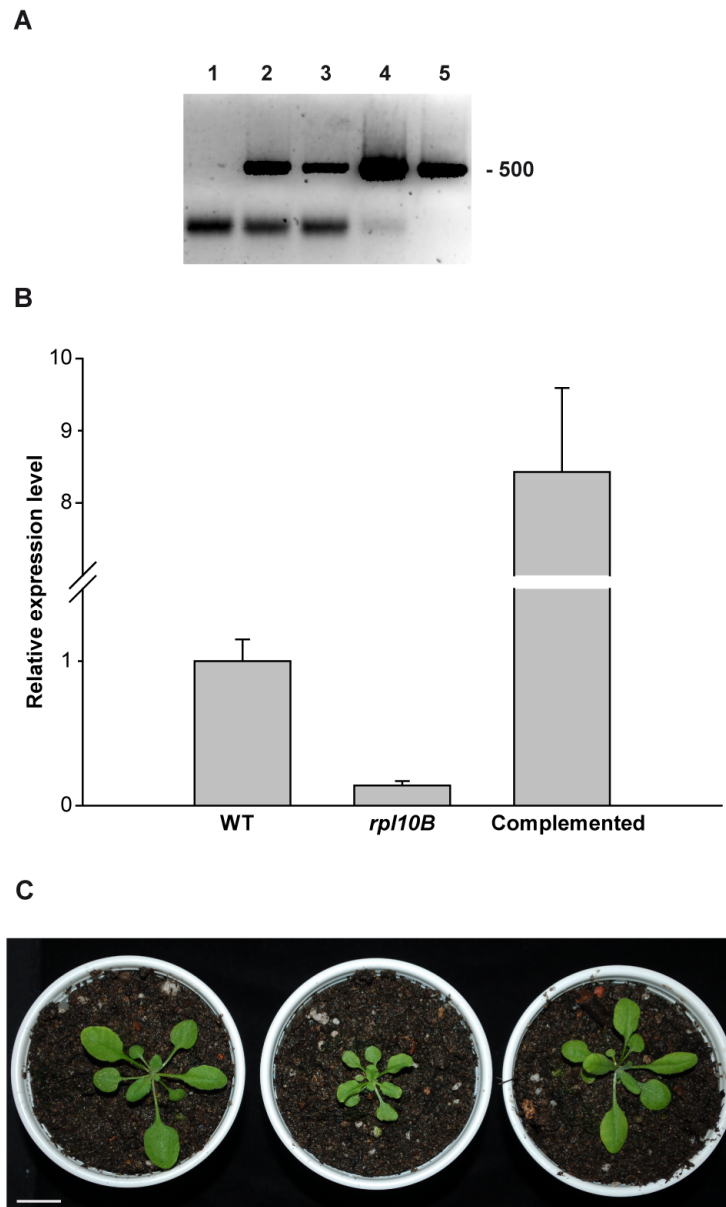

Complementation of *A. thaliana* homozygous *rpl10B* mutants with WT *At RPL10B*. A, Presence of WT *RPL10B* transcript in transformed *A. thaliana rpl10B* mutant plants analyzed by PCR on genomic DNA. Lanes 1: negative control (without DNA); lane 2-4: genomic DNA from leaves of transformed plants; lanes 5: positive control (pCHF3-*RPL10B*). B, *At RPL10B* expression level in Arabidopsis WT, *rpl10B* homozygous and complemented plants analyzed by RT-qPCR. Each reaction was normalized using the  $C_t$  values corresponding to the *POLYUBIQUITIN10* mRNA. The means of the results obtained using three independent biological experiments are shown, the error bars indicate the S.D. of the samples. WT levels were set at 1. C, 15-day-old WT (left), *rpl10B* mutant (middle) and complemented plants. Scale bar: 1 cm.

### Supplemental Figure 4

**A**

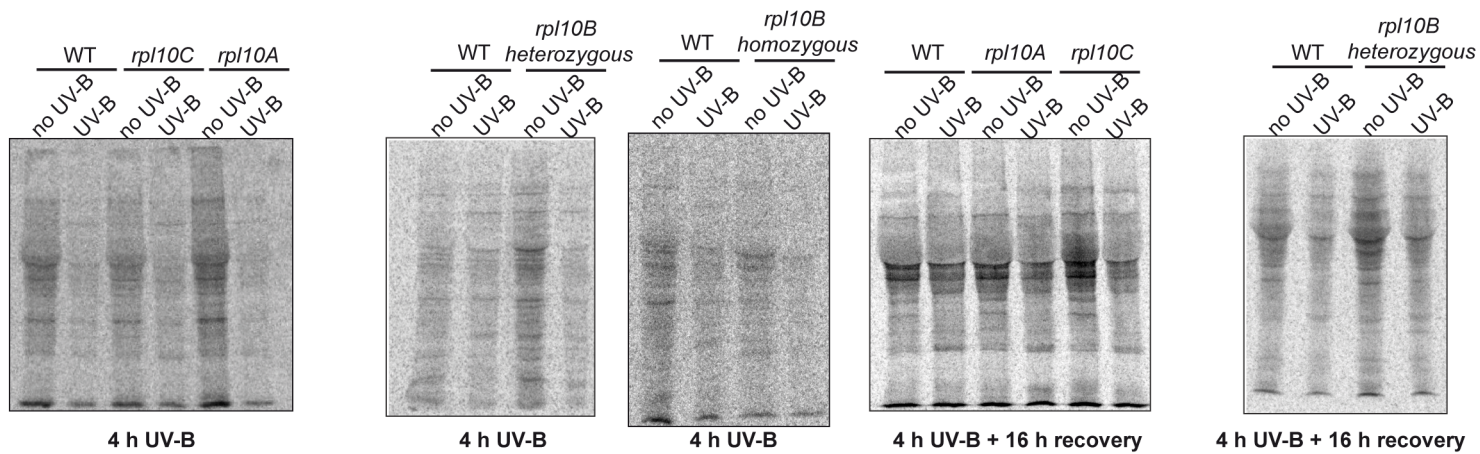

**B**

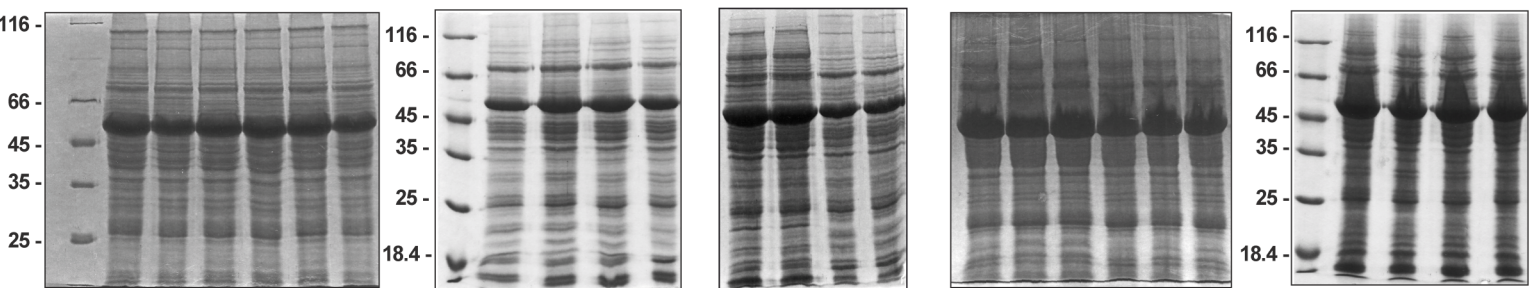

Inhibition of protein synthesis by UV-B in *A. thaliana* WT and *rpl10* mutant plants. Forty micrograms of total proteins were resolved by 12% SDS-PAGE after *in vivo* [<sup>35</sup>S]Met labeling, visualized by autoradiography (A) and staining with Coomassie Blue (B) following the UV-B treatment and recovery period indicated.

## Supplemental Figure 5

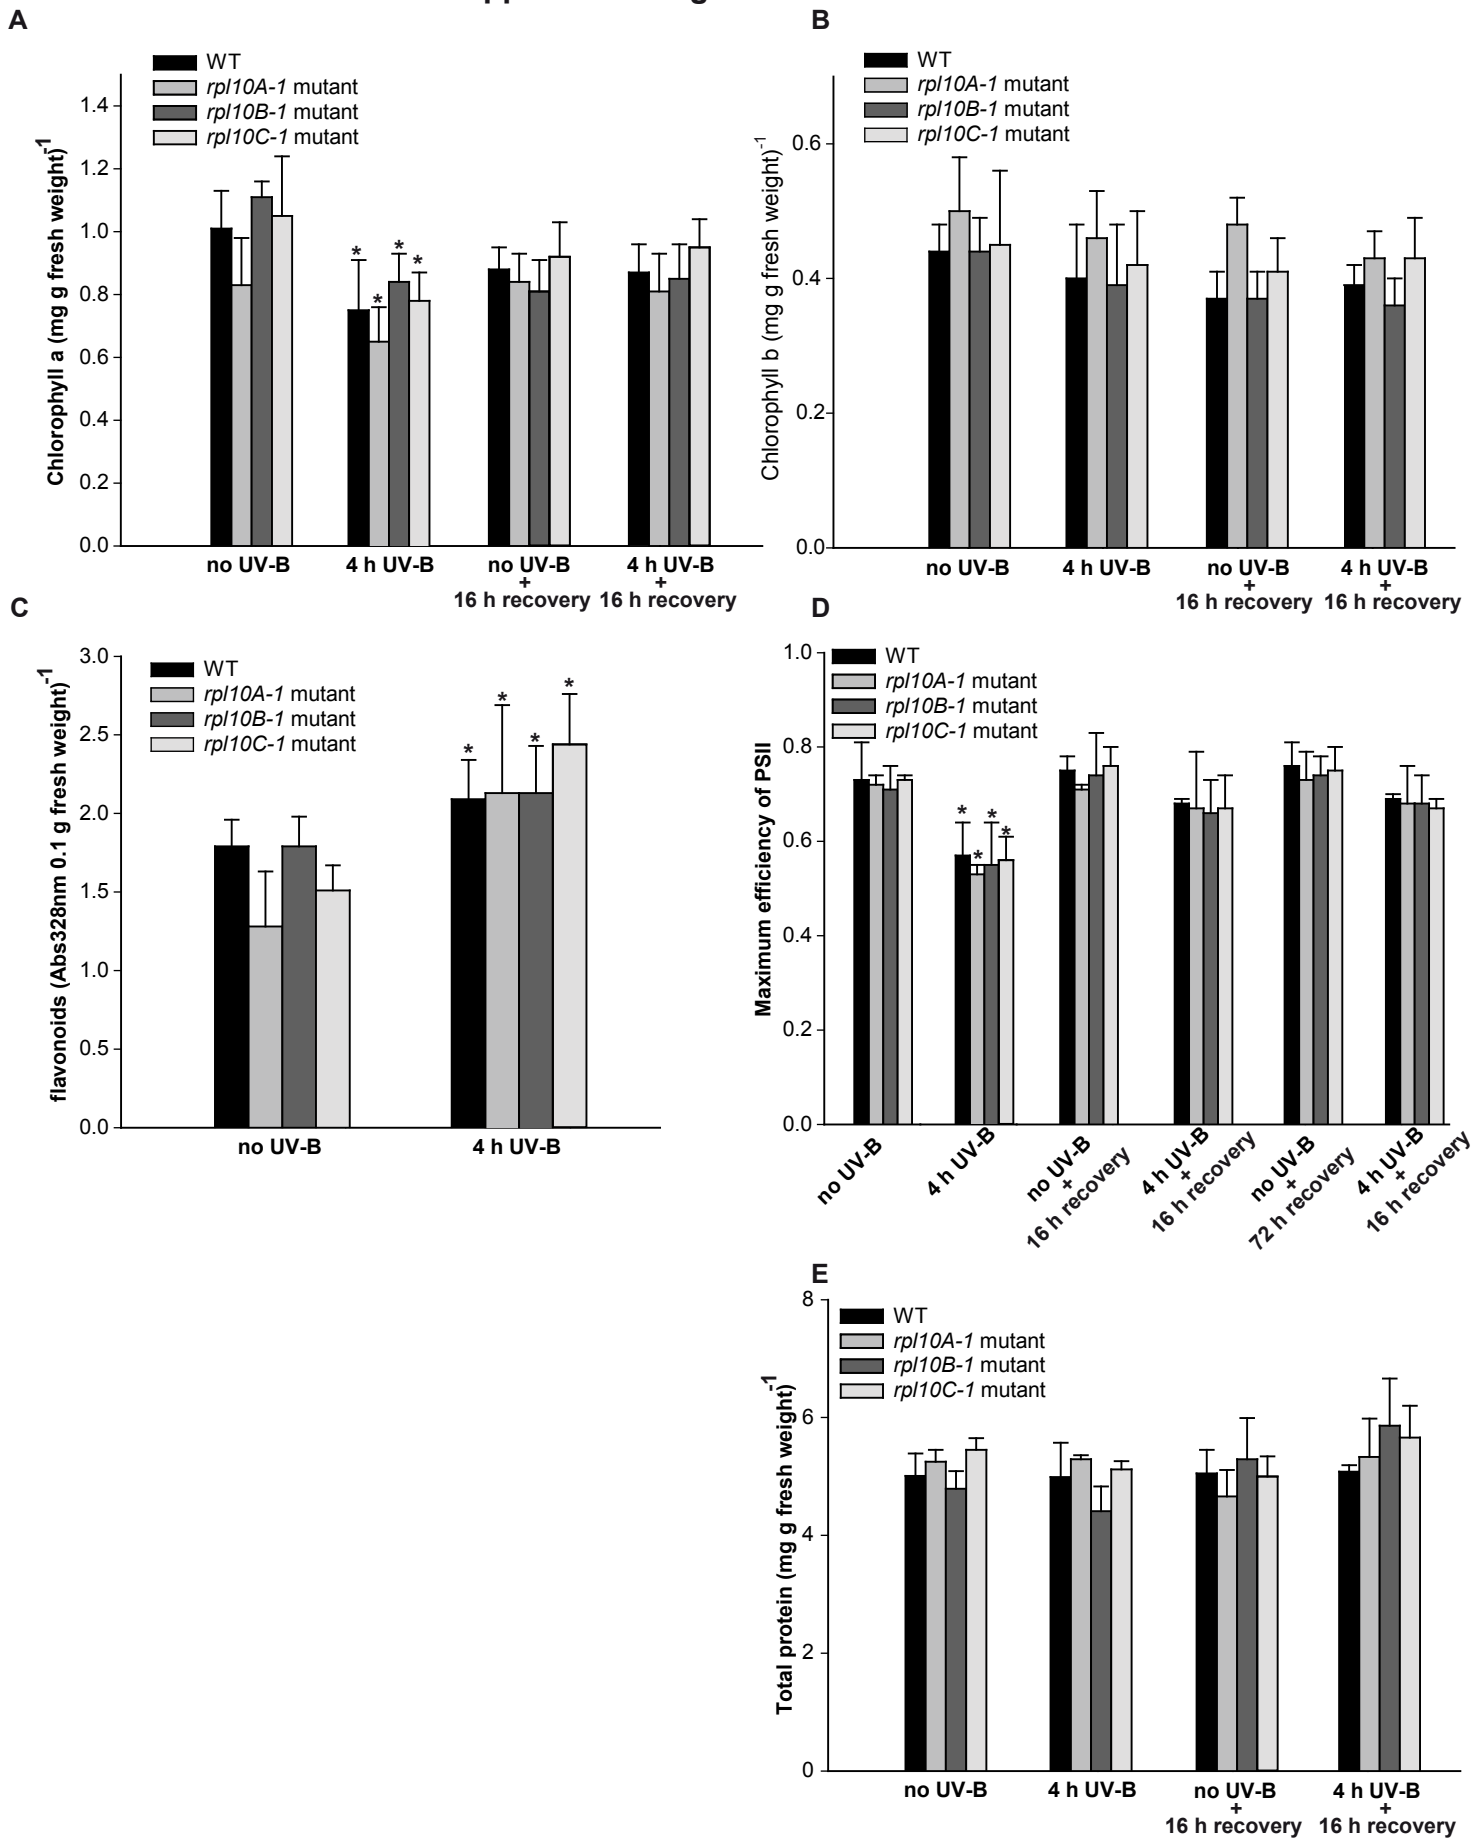

UV-B treatment is not lethal to *A. thaliana* plants. Chlorophyll a (A), Chlorophyll b (B), Flavonoids (C), Maximum Efficiency of PSII (D) and Total proteins (E) were measured after 4 h UV-B (4 h UV-B), 16 h post-treatment (16 h recovery) and in untreated controls (no UV-B). Measurements are the average of six adult leaves from four different plants. Statistical differences from the control are marked with an asterisk ( $P < 0.05$ ).

## Supplemental Figure 6

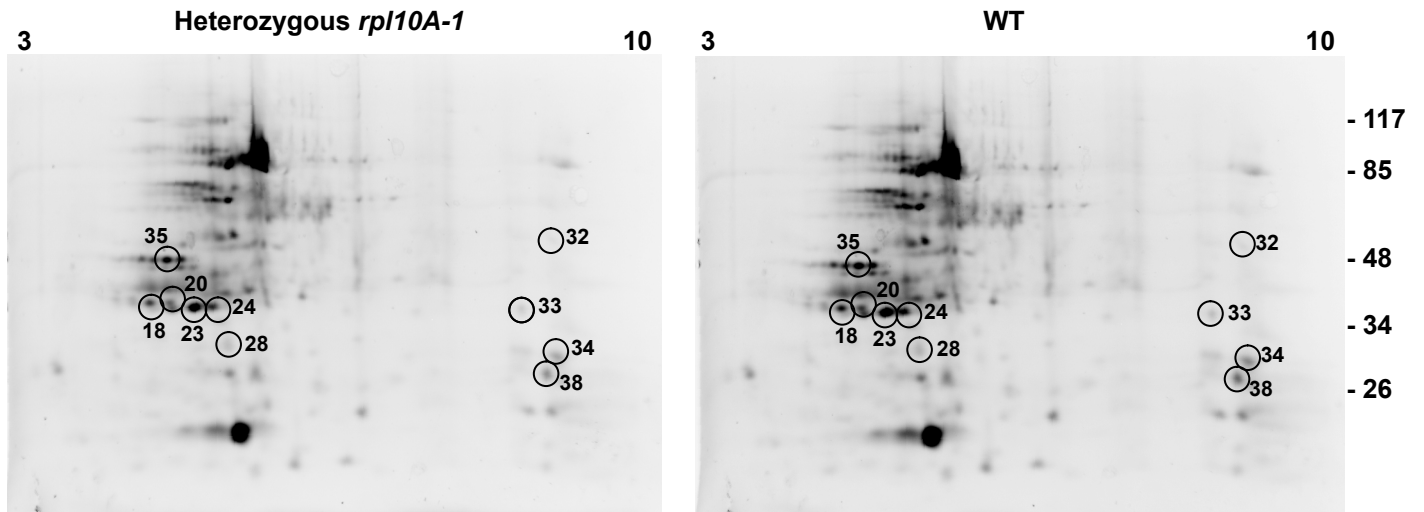

Typical 2D gels of leaves from heterozygous *rpl10A-1* mutant and WT plants after a 4 h UV-B treatment. As examples of proteins with differential expression, the relative abundances of some but not all spots annotated by the number that appears in Supplemental Table S3 are shown. The graphs represent one example from at least three different gels used for the differential analysis. The first dimension was carried out using 17 cm immobilized pH gradient strips (pH 3–10); acidic side to the left; and the second dimension was on 12.5% (w/v) SDS–PAGE. The relative abundance of proteins was determined. The protein spots with changes in intensities (least 1.5-fold,  $P < 0.05$ ) were considered to be different.

## A Supplemental Figure 7 mutant/WT

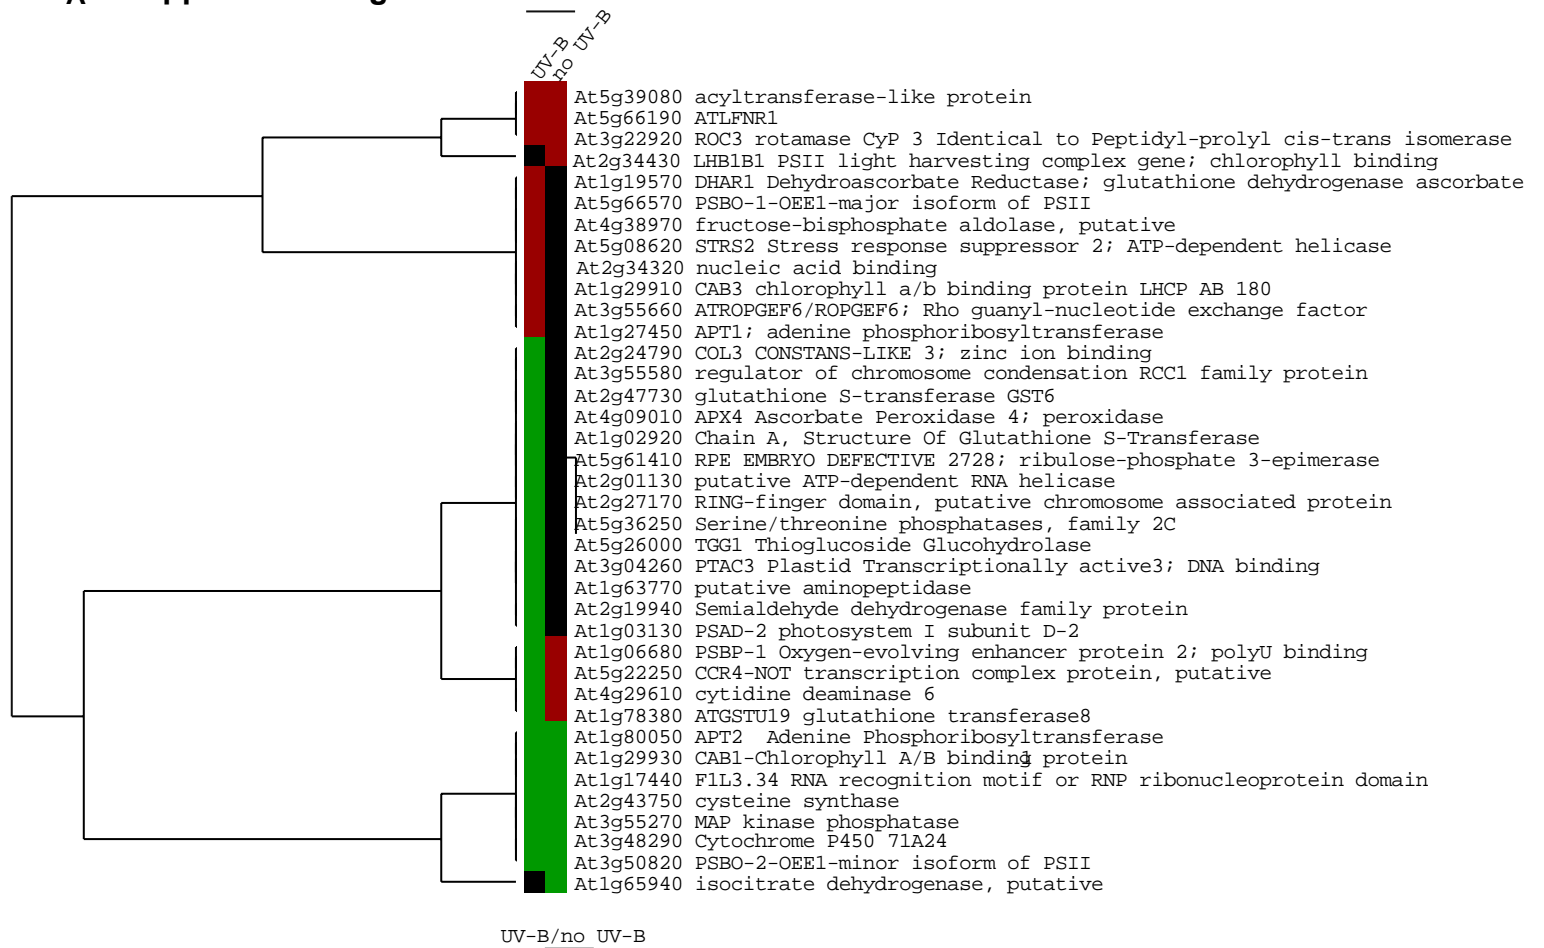

UV-B/no UV-B

## B

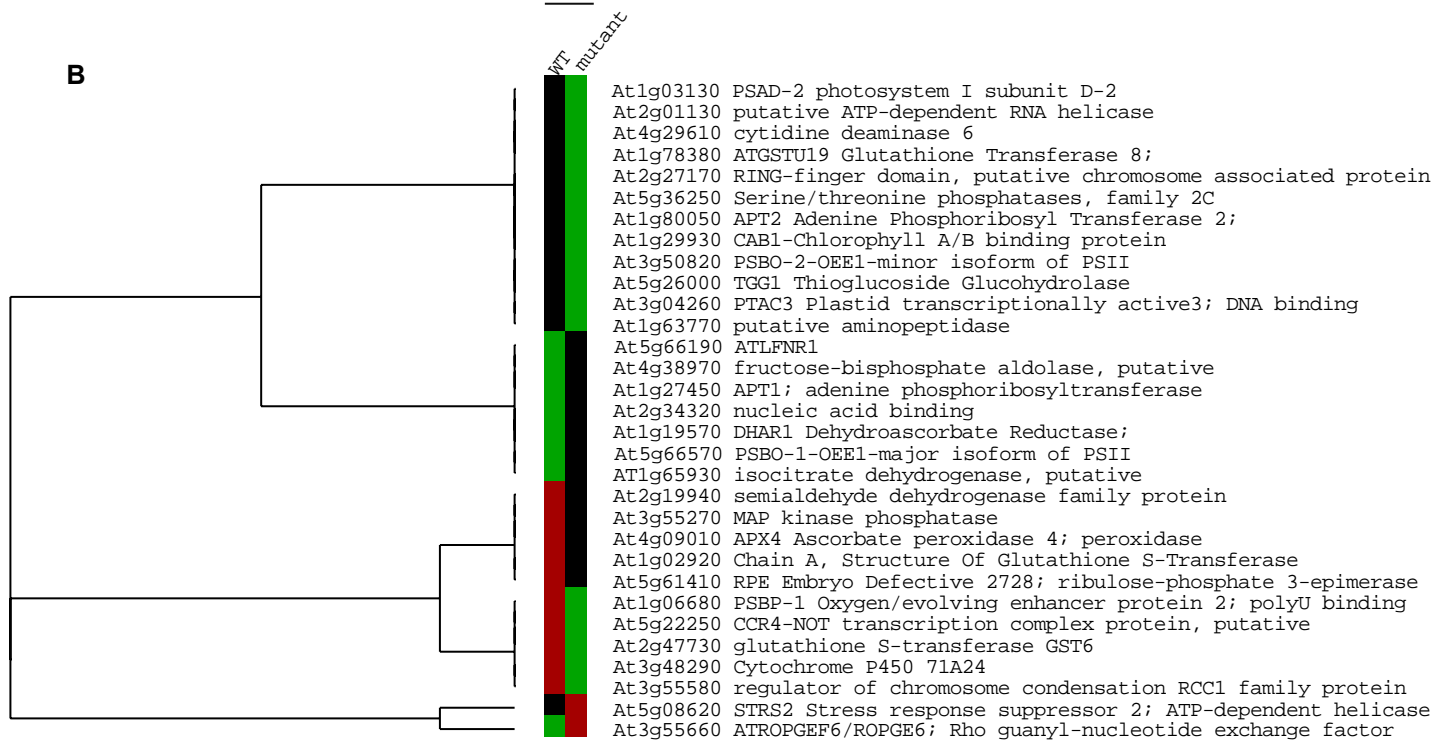

Hierarchical cluster analysis of proteins showing different levels in *rpl10A* mutant plants in comparison to WT plants under control conditions and after a 4h UV-B treatment identified by MS. A, Proteins included show different levels in *rpl10A* mutants (at least 1.5-fold) in comparison to WT plants under control or UV-B conditions. B, Proteins included show differential abundance (at least 1.5-fold) after a UV-B treatment; these proteins changed differentially in WT plants than in the *rpl10A* mutant. Red indicates higher protein levels than the reference, green indicates lower protein levels than the reference, and black indicates no significant change.



## Supplemental Figure 8

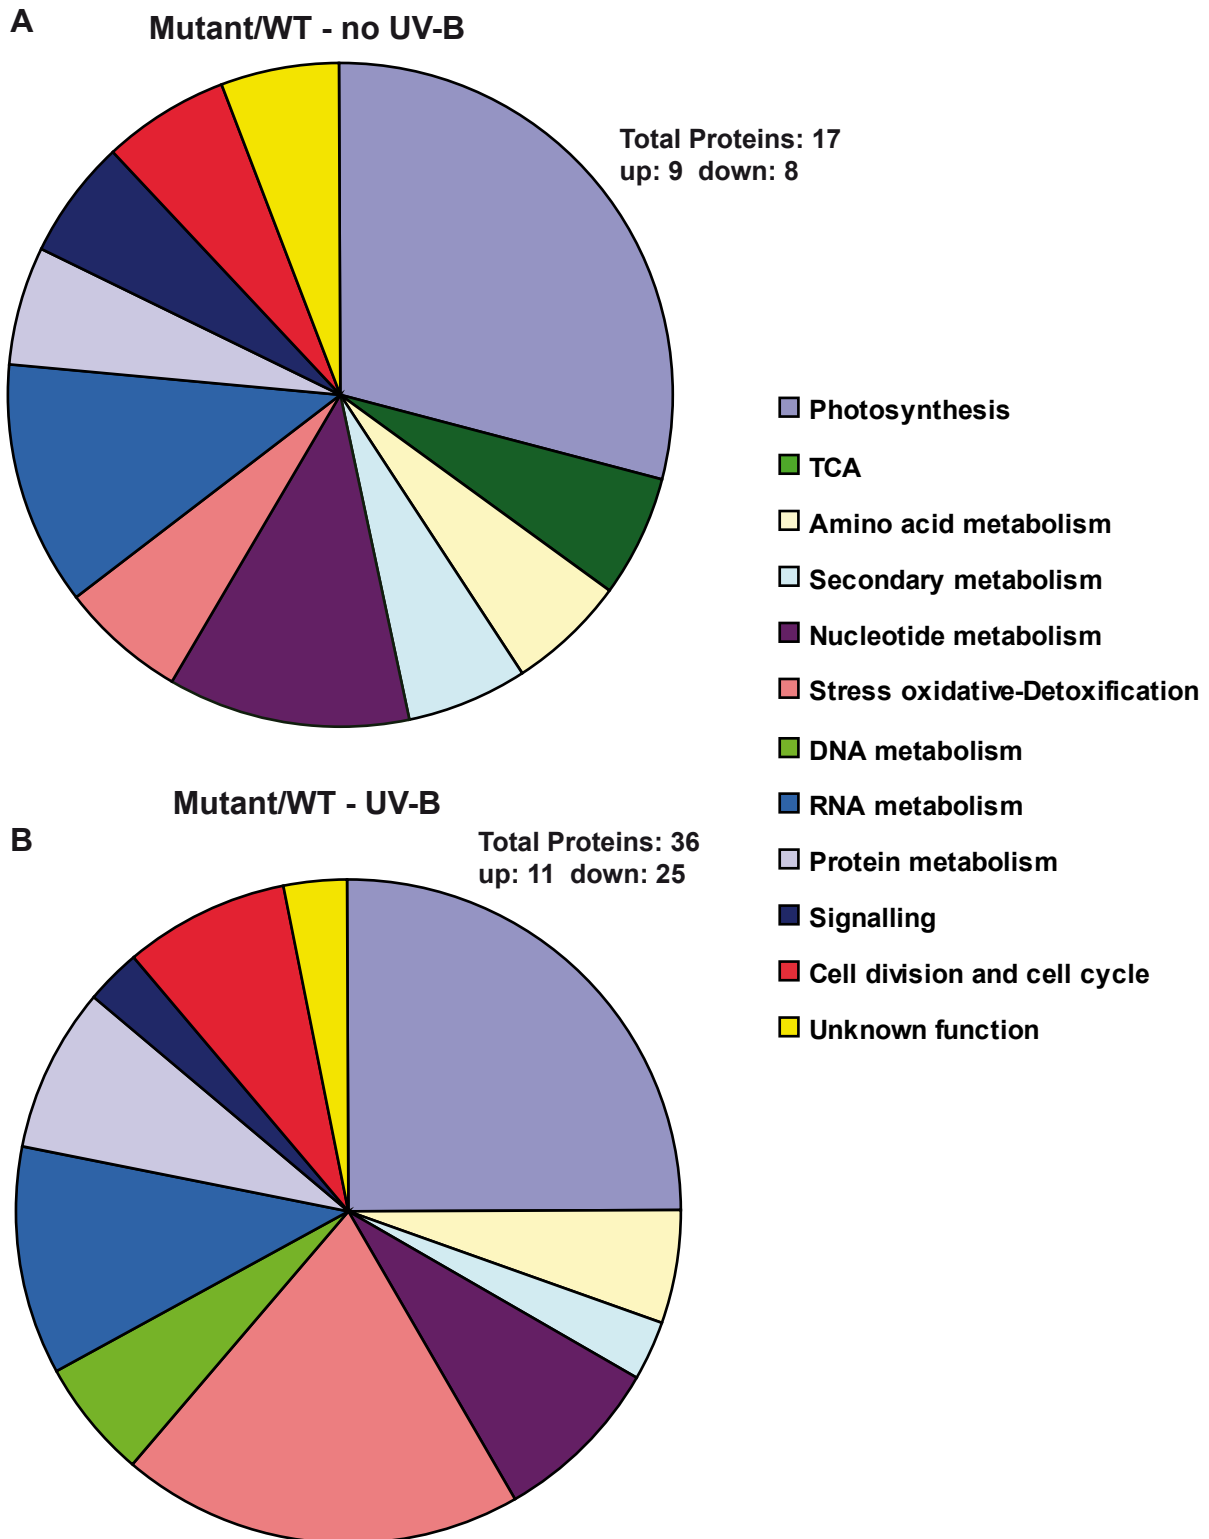

Classification of proteins showing different levels in the *rpl10A* mutant in comparison to WT plants based on their cell functions. Proteins were identified by 2D Gel electrophoresis and those showing changes in abundances of at least 1.5-fold were included. A, Proteins changed in the *rpl10A* mutant under control (no UV-B) conditions. B, Proteins changed in the *rpl10A* mutant after 4 h of UV-B.

**Supplemental Figure 9.** *RPL10s* promoter sequences with predicted cis-elements. The transcription initiation site (referred to as +1) is indicated in bold letter and the ATG start codon is shown in bold and underlined letters. Numbers at the left refer to the positions of nucleotides relative to the putative transcription initiation site.

***RPL10A***

-1000 TAACTTGAAAAGTTTCGGTGTGGAGATCTAACGCTAAAAC**TTAATTTCTTTCTTCCCGGTTA**  
Homeobox

-937 ACCAATAAAGCGATCCATCTACATACAGAGCATGCCCCGAGACGAGGAAGTATTAATCCGAT  
**CCAAT-BOX**

-874 AAGGAGAAGAAGGATTGATATACCT**CCAAGTGTGGTGC**TAAAATCAAAA**ACTT**CACATGTAG  
UVBox MYC2

-811 TAGCGTTTTCTAGGCCAAGTTCGGAAGAGTTATACATAACCAAACCGGTTTTGTATATGCCACT  
UVBox ARF1

-748 GATTTTGTCTTTGCCAAATCCAAATTTAACGTGACTAAAATAACTTGGCTGCTCAAGACAGAT  
ACE UVBox

-685 TTGTTGCAACCTGGAAACAGGGAAACGT**CGATGCCATCGAGTGGCGGGATTATAAACAATGTT**  
ACE

-622 GTTTAAGGTTTGGTAATCAAAGAGGCAAACAAGACCGTCAACA**CTATTGTGGAAAAGTTGGTA**  
**MRE**

-559 AATATGATATCGTTCTGATGATATCAACAAC**ACGT**TAGTTTAAAGTGGAGGAGAATCAGCAGT  
ACE

-496 AACATGATGGGGCAACACCAACGTACTGGGTACTT**CAGACACCAATACAAGATTTAGATCTTT**  
ACE CCAAT-BOX

-433 CCCGCCAGCTGAGCAGATCAACTGTTTCGCCTGGAAATATTGAGATT**CGATTGTCAACTTCCA**

-370 TTGTTTCAAGCAGACTTGAATCTGAGCAGAGATTT**CACCGGAAC**TCTCTCAAGAATATCCTC

-307 AACGGTGTCTGGGGAAGCAATTGCATTTATTTCTGTCTATTGAGAGGATTTTGTCTGAGT

-244 GATGGATAACATGAAAGATATGCTTATTTGTATCAATTCAAT**CCAAT**GTTGATTTTTTCCTTG  
CCAAT-BOX

-181 AGGAGGAAGATAAAAAAAAAAAAAACGTATATACAATCGATGGGCC**CTAACCC**TATCCCTAACAA  
GATA-BOX ACE SORLIP2

-118 AATCTCTTTAATATGTAATGCGCTTTAATAGTTAAAGCCATTAGTTAAAAACCCAGAGCTAT

-55 ATTGTTGACCTAGCAAATTTCGGATCTATAAATGAAGCCATTTTCTAGGTCATT**AGTT**TTTTT  
W-BOX +1

CGTCGAGCAGCCGCGCTTTTGGCCGAGGAAGGATAAAGAGAGACGCC**ATG**  
I-BOX

***RPL10B***

-1000 AGTTTTGCCGTACATCCCTATCAAAGCTGTGATTAAATGCAAGTCTAAATCAAGGCCAATCTT  
CCAAT-BOX

-937 GATGCATAACACATGAGCAGATTCTGCTCCAGACAAATCTCCTAGATCACTAATAGCCGAAAG  
MYC2/DPBF1

-874 AAAAAGTAAGCA**ACGT**ACTGACATTAACGACCACCTCACTTTTTCTCATAATCCTAAACAAA  
ACE

-811 TCCAAAGCCAACGCTTTCTTAGAAACCTGAAGATACCCATTCATCAAAGTACTAA**ACGT**AAACA  
ACE

-748 GCATCAACACTCTGCGGCATTTCGTCGAACACTTTCCGAGCATCACTAATCTTCCACAAAACA

-685 CAGTAAAAATGTATAAGAGCATTCTCAAATCAGTAAAAACCATAAAACCCAGATCTCAAAGCA

-622 ATCCCATGCAATCCCTCACCAATTGAAACACACAATTCAGGAAACATGATTTAAGAGTCGTG  
CCAAT-BOX

-559 ATAAACGAGAATCGGTCCAAGGTCAAACCTTTAGCTCTCAATTGGTTGAAAACAGAAAATGCT  
GATA-BOX UVBox MRE

-496 CGCTCCGGCTCATCGCTAATCGAGTAACCTCTGATCATAGTGTTGAACATAAAGAGATTAGTG  
                                   **GT1-motif**  
 -433 TTGGAGACATGCTCGAAGATCGACGAAGCGTATCGAATGTCAAGTACAGAGGAAAAGCAAGA  
 -370 AGCTTGCTCACTGCGAAATCGTCCTTGTGCGAGTCCCGTTTCACCATGTAACCATGAATTCGA  
 -307 GAAACTTCGACGGTGTCTCTGCAAGACCTTAGATCGTTGATAAGTTTCTGACATTGTGGAGAC  
                                                           **GATA-BOX**  
 -244 AACACGATTCAAGATTCCTACGACGGAACACGAAATTGCGCCTGAGCCGTGACGTAATCGCC  
                                                                                   **ACE**  
 -181 AATGTCATCAGAAAGAAAAAAGTCGCCGGAATAAACACGGATTTGTTTTTAAGCTTAAAA  
 -118 TATCAAATGGGCTTTAGTTCCTTAATGGGCTTATTTTTGGTCCAAATCCAGTTACGTGGCAA  
                                                           **SORLIP2**                                                  **ABRE/ACE**  
 -55 AGAGAATTAGGGCTCTTTGTCTTCTTATTTAAAAAAGTTACGCCTTCTTCTTCTTCTTCTT  
                                                                                           +1  
                                                                                           **I-BOX**

***RPL10C***

-1000 GATGCTATCACGACAAATTAGTCCAAAATGGGCAGCGTATATTTTCTTATATGGGCTTAAAA  
                                                                                   **SORLIP2**  
 -937 AAGGAAACTAACTAATTATAATCAACTTATGATCATCAGTCAATTATGAAAGGTTATATTGA  
                                                                                           **MRE**  
 -874 CAGGAGATTGTGTGTTTTAAACCATTTTGAGTATATCTGTTTTGAATCATTTGAGACAATTGT  
 -811 GATTTTTGCTTGTCTGATCCCATTCTTTAGTCTCGTGCATATGTGATCTTGTATTGCTAA  
 -748 TAAGGATTATGATCTGTCCCCTAAACTTCAAAATTTGGAGCCATGATCTGATTTTTGAATGT  
 -685 GGTTCCTATAGTTTTTTGCTTGATATTTGCGAGCAATGATGGTGAATATCCATCTAAGTCA  
 -622 AATACGATTCCATTTCTCTTTAATAACAAATCAAATAAGAAAATGAAGCTTGCAAGCTCGC  
 -559 TTGTACTAAGTTTCTGAAAGTTTTTATCTCGACTAAATAATGTCCAAGATGGAAGCAAGACA  
                                                                                   **UVBox**  
 -496 TAAGCTCCATTGTTGATAGAATGGAGCTTATGTGGCTTTGTTTTGTTTCAAATGGTTTT  
 -433 TAACTTATGTGTGATTGCTTAGCCAAATGTGGACTCTGAAGATGGTTTTTCAGTTTTTTGGTTTT  
 -370 AATGTCCTTGTACTATTGTTACACAGTACACAGAGTTACAAAAGATCATTCATCATTGTT  
 -307 TATAAGAGAACAAATTTGATAACATATATCTTTTTGATGTGGATGGATTTGTTAACCTCTAGA  
                                                           **GATA-BOX**  
 -244 AGAACACCCAAATTTGGCTACAAAGTTGTCAACACATTGTTCTTCGTTCTTCTTTGACTTTGA  
                                                                                                           **T-BOX**  
 -181 CTAAAAATAAAAAATAACCTCGGCC TAAGAAAATAGCGTGTTCACATTGGATGATTAAGGCCT  
 -118 GGACCGAGTATCAAATAATCTAAATGGGCC TAGCTAAGCAGTTACGTAAGCTAAATTTAGG  
                                                           **SORLIP2**                                                  **ACE**  
 -55 GTTTGTTTTTGCCGCACCTATAAAATAACAACACAGCTTCCCATTTGTAAATTTCTAGGGTTTT  
                                                                                                           +1  
 GCAAACCAACACCGAAGATCCAACACG**ATG**

**Supplemental Table S2. Segregation of *RPL10A* alleles**

**SALK 010170 line (n=47)**

|                 |          |
|-----------------|----------|
| Heterozygote    | WT       |
| <b>35 (74%)</b> | 12 (26%) |

**Progeny of *rpl10A* heterozygous plant (n=104)**

|                 |          |
|-----------------|----------|
| Heterozygote    | WT       |
| <b>68 (65%)</b> | 36 (35%) |

**SALK 106656 line (n=67)**

|                 |          |
|-----------------|----------|
| Heterozygote    | WT       |
| <b>57 (85%)</b> | 10 (15%) |

**Progeny of *rpl10A* heterozygous plant (n=32)**

|                 |          |
|-----------------|----------|
| Heterozygote    | WT       |
| <b>20 (63%)</b> | 12 (37%) |



**Supplemental Table S5. Primer Sequences used for PCR**

| Name                            | Sequence                                     | Purpose              |
|---------------------------------|----------------------------------------------|----------------------|
| <i>Zm thioredoxine-like-for</i> | 5'-GGACCAGAAGATTGCAGAAG-3'                   | qRT-PCR              |
| <i>Zm thioredoxine-like-rev</i> | 5'-ACGGATGTCCCATGAAGA-3'                     | qRT-PCR              |
| <i>Zm actine1-for</i>           | 5'-CTTCGAATGCCAGCAAT-3'                      | qRT-PCR              |
| <i>Zm actine1-rev</i>           | 5'-CGGAGAATAGCATGAGGAAG-3'                   | qRT-PCR              |
| <i>Zm RPL10-1-for</i>           | 5'-TGCAAGGACAACAATGC-3'                      | qRT-PCR              |
| <i>Zm RPL10-1-rev</i>           | 5'-TCTGCCCTCGCTCTTGT-3'                      | qRT-PCR              |
| <i>Zm RPL10-2-for</i>           | 5'-GCTCGGTAACCATGGAAGA-3'                    | qRT-PCR              |
| <i>Zm RPL10-2-rev</i>           | 5'-GAGATAAGCAGGTTACACA-3'                    | qRT-PCR              |
| <i>At UBQ10-for</i>             | 5'-AAGCAGCTTGAGGATGGAC-3'                    | qRT-PCR              |
| <i>At UBQ10-rev</i>             | 5'-AGATAACAGGAACGGAAACATAGT-3'               | qRT-PCR              |
| <i>At CDPK3-for</i>             | 5'-CGCTGAGAACCTTTCTGAAG-3'                   | qRT-PCR              |
| <i>At CDPK3-rev</i>             | 5'-CCATCTCCATCCATATCAGC-3'                   | qRT-PCR              |
| <i>At RPL10A-for-1</i>          | 5'-TCCTTCTCATTCCGGTGA-3'                     | qRT-PCR              |
| <i>At RPL10A-rev-1</i>          | 5'-GCCAAGAACGAAGGAACA-3'                     | qRT-PCR<br>screening |
| <i>At RPL10B-for-1</i>          | 5'-TGGTGTTCCTCGATCCTAA3'                     | qRT-PCR              |
| <i>At RPL10B-rev-1</i>          | 5'-ATCTTTCCCGGCAGACTT-3'                     | qRT-PCR<br>screening |
| <i>At RPL10C-for-1</i>          | 5'-CCAACACCGAAGATCCAA-3'                     | qRT-PCR<br>screening |
| <i>At RPL10C-rev-1</i>          | 5'-TTTTGGGATCTGGCACAC-3'                     | qRT-PCR<br>screening |
| <i>At RPL10A-for-2</i>          | 5'-GCTTTGGGTACTTGTGCTC-3'                    | screening            |
| <i>At RPL10B-for-2</i>          | 5'-GTCGCCGGAATAAACACG-3'                     | screening            |
| <i>At RPL10C-for-2</i>          | 5'-GCCAAATGTGGACTCTGAAG-3'                   | screening            |
| <i>At RPL10B-for-3</i>          | 5'-TAAATTGGTACCACAACAA<br>TCAACGCGATGGGAC-3' | cloning              |
| <i>At RPL10B-rev-2</i>          | 5'-ATTTAAGTCGACCTGTGCACCAGCTG                | cloning              |

|                   |                                 |           |
|-------------------|---------------------------------|-----------|
|                   | ACAAGAAC-3'                     |           |
| <i>prom35-for</i> | 5'-CTATCCTTCGCAAGACCCTTC-3'     | screening |
| <i>LB-SALK</i>    | 5'-GTCCGCAATGTGTTATTAAGTTGTC-3' | screening |
| <i>LB3-SAIL</i>   | 5'-TTCATAACCAATCTCGATACAC-3'    | screening |
